# Supplementary material for: Genetic Background of Blood β-Hydroxybutyrate Acid Concentrations in Early-Lactating Holstein Dairy Cows Based on Genome-Wide Association Analyses
Source: MDPI journal article supplement (doi:10.3390/genes15040412), 2024-03-26
Supplement: s1 [file s1]

**Supplementary Table S1.** Descriptive statistics of blood BHB trait for individuals with genotypes in different parity.

| Parity <sup>1</sup>             | num  | Mean   | SD    | Min    | Max   |
|---------------------------------|------|--------|-------|--------|-------|
| BHB <sub>2</sub>                | 844  | 0.792  | 0.437 | 0.100  | 5.000 |
| BHB <sub>3</sub>                | 695  | 0.876  | 0.461 | 0.100  | 3.900 |
| aBHB <sub>II</sub> <sup>4</sup> | 1030 | -0.087 | 0.099 | -0.310 | 0.594 |

<sup>1</sup>represents the number of individuals with both genotype and phenotype values; <sup>2</sup> BHB<sub>2</sub> and BHB<sub>3</sub> represent phenotypic values for blood BHB; <sup>4</sup> aBHB<sub>II</sub> represents DMU-estimated breeding values for BHB.

**Supplementary Table S2.** The Kyoto Encyclopedia of Genes and Genomes (KEGG) pathways and Gene Ontology (GO)involved in candidate genes( $P<0.05$ ).

| Term                                          | Database     | ID       | P-Value               | Input                                                               |
|-----------------------------------------------|--------------|----------|-----------------------|---------------------------------------------------------------------|
| Fatty acid elongation                         | KEGG PATHWAY | bta00062 | 1.16×10 <sup>-3</sup> | HADHB,<br>HADHA                                                     |
| beta-Alanine metabolism                       | KEGG PATHWAY | bta00410 | 1.74×10 <sup>-3</sup> | HADHA,<br>SMOX                                                      |
| Fatty acid degradation                        | KEGG PATHWAY | bta00071 | 2.33×10 <sup>-3</sup> | HADHB,<br>HADHA                                                     |
| Valine, leucine and<br>isoleucine degradation | KEGG PATHWAY | bta00280 | 3.37×10 <sup>-3</sup> | HADHB,<br>HADHA                                                     |
| Fatty acid metabolism                         | KEGG PATHWAY | bta01212 | 4.29×10 <sup>-3</sup> | HADHB,<br>HADHA                                                     |
| Metabolic pathways                            | KEGG PATHWAY | bta01100 | 9.21×10 <sup>-3</sup> | PANK2,<br>SMOX,<br>HADHB,<br>HADHA,<br>NDST4,<br>SELENOI,<br>DNMT3A |
| Progesterone-mediated<br>oocyte maturation    | KEGG PATHWAY | bta04914 | 9.42×10 <sup>-3</sup> | ANAPC1,<br>CDC25B                                                   |
| MicroRNAs in cancer                           | KEGG PATHWAY | bta05206 | 9.88×10 <sup>-3</sup> | CDC25B,<br>DNMT3A,<br>BCL2L11                                       |
| Phosphonate and<br>phosphinate metabolism     | KEGG PATHWAY | bta00440 | 1.13×10 <sup>-2</sup> | SELENOI                                                             |
| Cell cycle                                    | KEGG PATHWAY | bta04110 | 1.76×10 <sup>-2</sup> | ANAPC1,<br>CDC25B                                                   |
| Pantothenate and CoA<br>biosynthesis          | KEGG PATHWAY | bta00770 | 3.20×10 <sup>-2</sup> | PANK2                                                               |
| Transcriptional<br>misregulation in cancer    | KEGG PATHWAY | bta05202 | 3.81×10 <sup>-2</sup> | RUNX2,<br>SUPT3H                                                    |

|                                                        |               |            |                       |                                                                                   |
|--------------------------------------------------------|---------------|------------|-----------------------|-----------------------------------------------------------------------------------|
| Glycosaminoglycan biosynthesis-heparan sulfate/heparin | KEGG PATHWAY  | bta00534   | 3.98×10 <sup>-2</sup> | <i>NDST4</i>                                                                      |
| Butanoate metabolism                                   | KEGG PATHWAY  | bta00650   | 4.60×10 <sup>-2</sup> | <i>HADHA</i>                                                                      |
| chromatin binding                                      | Gene Ontology | GO:0003682 | 2.66×10 <sup>-4</sup> | <i>RUNX2,</i><br><i>ASXL2,</i><br><i>SATB2,</i><br><i>DNMT3A,</i><br><i>CENPB</i> |
| osteoblast development                                 | Gene Ontology | GO:0002076 | 3.45×10 <sup>-4</sup> | <i>RUNX2,</i><br><i>SATB2</i>                                                     |
| histone acetyltransferase activity                     | Gene Ontology | GO:0004402 | 9.47×10 <sup>-4</sup> | <i>PHF10,</i><br><i>SUPT3H</i>                                                    |
| T cell homeostasis                                     | Gene Ontology | GO:0043029 | 9.47×10 <sup>-4</sup> | <i>ZC3H8,</i><br><i>BCL2L11</i>                                                   |
| positive regulation of mitotic cell cycle              | Gene Ontology | GO:0045931 | 1.02×10 <sup>-3</sup> | <i>CDC25B,</i><br><i>SMOC2</i>                                                    |
| odontogenesis of dentin-containing tooth               | Gene Ontology | GO:0042475 | 2.23×10 <sup>-3</sup> | <i>RUNX2,</i><br><i>BCL2L11</i>                                                   |
| odontogenesis of dentin-containing tooth               | Gene Ontology | GO:0042475 | 2.23×10 <sup>-3</sup> | <i>RUNX2,</i><br><i>BCL2L11</i>                                                   |
| endosomal transport                                    | Gene Ontology | GO:0016197 | 2.44×10 <sup>-3</sup> | <i>AP5S1,</i><br><i>RAB10</i>                                                     |
| microtubule binding                                    | Gene Ontology | GO:0008017 | 3.69×10 <sup>-3</sup> | <i>SPEF1,</i><br><i>BCL2L11,</i><br><i>KIF3C</i>                                  |
| cellular response to insulin stimulus                  | Gene Ontology | GO:0032869 | 3.88×10 <sup>-3</sup> | <i>RAB10,</i><br><i>INSIG2</i>                                                    |
| roof of mouth development                              | Gene Ontology | GO:0060021 | 4.02×10 <sup>-3</sup> | <i>INSIG2,</i><br><i>SATB2</i>                                                    |
| spermatogenesis                                        | Gene Ontology | GO:0007283 | 4.26×10 <sup>-3</sup> | <i>DNMT3A,</i><br><i>BCL2L11,</i><br><i>MERTK</i>                                 |

---
